# Supplementary material
Source: Springer Nature journal article supplement (https://www.springermedizin.de/resource/supplementary/12911_2009_304_MOESM11_ESM.pdf/9525492)

# Breakdown of loading times

- Loading Production memory
- Loading Working memory
- Loading Logger

- Loading Rule Flow
- Loading Rule file
- Loading remainder of Production memory

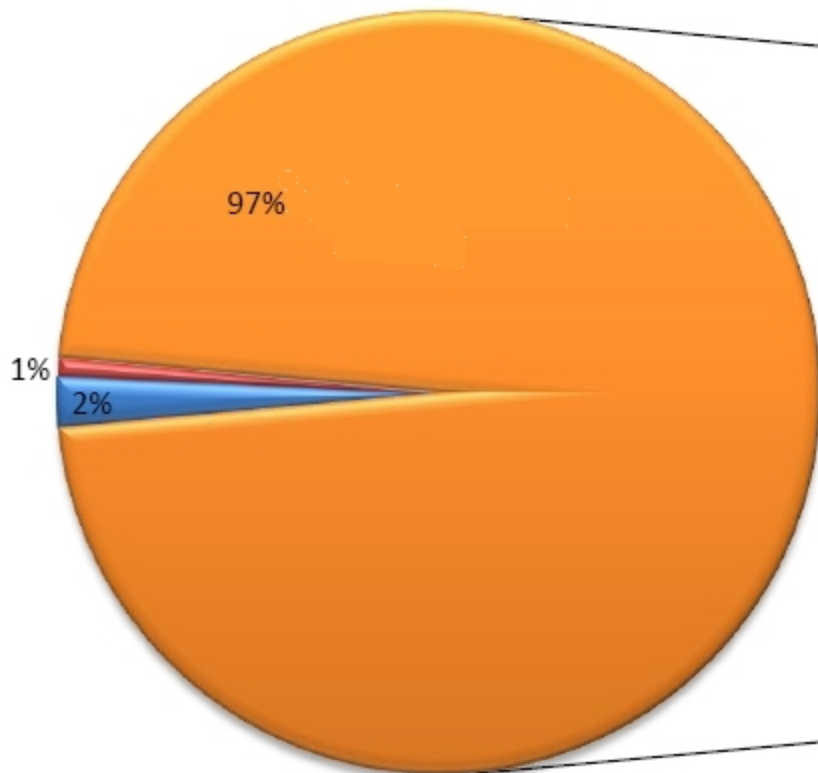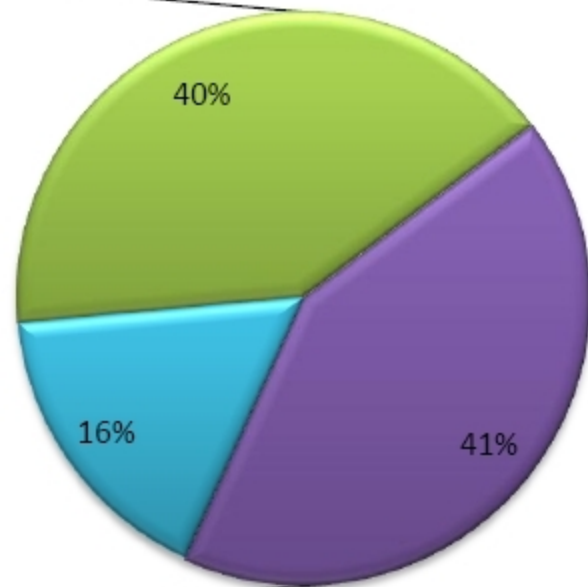

Supplement: MOESM11 [file 9525492]
